# Supplementary material for: Hepatoprotective Potency of Chrysophanol 8-O-Glucoside from Rheum palmatum L. against Hepatic Fibrosis via Regulation of the STAT3 Signaling Pathway
Source: MDPI journal article supplement (doi:10.3390/ijms21239044), 2020-11-27
Supplement: s1 [file s1]

## Supplementary Material

---

### Hepatoprotective Potency of Chrysophanol 8-O-Glucoside from *Rheum palmatum* L. against Hepatic Fibrosis via Regulation of the STAT3 Signaling Pathway

Yong Joo Park <sup>1,a</sup>, Kwang Ho Lee <sup>1,a</sup>, Mi Seon Jeon <sup>1</sup>, Yong Hoon Lee <sup>1</sup>, Yoon-Joo Ko <sup>2</sup>, Changhyun Pang <sup>3</sup>, Bonglee Kim <sup>4</sup>, Kyu Hyuck Chung <sup>1,\*</sup>, and Ki Hyun Kim <sup>1,\*</sup>

<sup>1</sup> School of Pharmacy, Sungkyunkwan University, Suwon 16419, Republic of Korea; pyj084@msn.com (Y.J.P); [sholaly@naver.com](mailto:sholaly@naver.com) (K.H.L.); [jmsun123@naver.com](mailto:jmsun123@naver.com) (M.S.J.); [yonghoon2090@gmail.com](mailto:yonghoon2090@gmail.com) (Y.H.L.)

<sup>2</sup> Laboratory of Nuclear Magnetic Resonance, National Center for Inter-University Research Facilities (NCIRF), Seoul National University, Gwanak-gu, Seoul 08826, Republic of Korea; [yjko@snu.ac.kr](mailto:yjko@snu.ac.kr) (Y.J.K.)

<sup>3</sup> School of Chemical Engineering, Sungkyunkwan University, Suwon 16419, Republic of Korea; [chpang@skku.edu](mailto:chpang@skku.edu) (C.P.)

<sup>4</sup> Department of Pathology, College of Korean Medicine, Kyung Hee University, Seoul 02453, Republic of Korea; [bongleekim@khu.ac.kr](mailto:bongleekim@khu.ac.kr) (B.K.)

\* Correspondence: [khchung@skku.edu](mailto:khchung@skku.edu) (K.H.C.); Tel.: +82-31-290-7714; [khkim83@skku.edu](mailto:khkim83@skku.edu) (K.H.K.); Tel.: +82-31-290-7700

### *General experimental procedures*

Ultraviolet (UV) spectra were determined using an Agilent 8453 UV-visible spectrophotometer (Agilent Technologies, Santa Clara, CA, USA). Infrared (IR) spectra were acquired using a Bruker IFS-66/S FT-IR spectrometer, and NMR spectra were measured using a Bruker Avance III HD 800 NMR spectrometer with a 5 mm TCI Cryoprobe (Bruker, Karlsruhe, Germany). Preparative high-performance liquid chromatography (HPLC) and semi-preparative HPLC (Waters Corporation, Milford, CT, USA) were performed using a Hecator-C18 column (250 × 21.2 mm, 7 μm) and a Phenomenex Luna Phenyl-hexyl 100 A column (250 × 10 mm, 10 μm), respectively, with a Waters 1525 binary HPLC pump equipped with a Waters 996 photodiode array detector. LC/MS analysis was performed on an Agilent 1200 Series HPLC system (Agilent Technologies) equipped with a diode array detector and a 6130 Series ESI mass spectrometer using an analytical Kinetex C18 100 Å column (100 × 2.1 mm i.d., 5 μm; Phenomenex, Torrance, CA, USA). Column chromatography was performed with a silica gel 60 (230–400 mesh; Merck) and an RP-C18 silica gel column (230–400 mesh; Merck). First-grade solvents (Samchun Pure Chemicals Co., Ltd., Pyeongtaek, Korea) were used for fractionation and isolation. Merck precoated silica gel F<sub>254</sub> plates and reverse-phase (RP)-18 F<sub>254s</sub> plates were used for thin-layer chromatography (TLC). Spots were detected on TLC under UV light (dual wavelength 254/365 nm) or by heating after spraying with anisaldehyde-sulfuric acid.

### *Sample material*

*R. palmatum* was purchased at Kyungdong herbal market, Korea (Seoul), in June 2019. The samples were identified by one of the authors (Prof. K. H. Kim). A voucher specimen (SKKU DW-2019-06) has been stored in the herbarium of the School of Pharmacy, Sungkyunkwan University, Korea (Suwon).

### *Cell culture*

LX-2 human HSCs were obtained from the American Type Culture Collection (Manassas, VA, USA). Cells were cultured in Dulbecco's modified Eagle medium (Sigma, St. Louis, MO, USA) supplemented with 10 % of fetal bovine serum (Biotechnics Research Inc., Lake Forest, CA, USA), penicillin (100 units/mL), and streptomycin (100 µg/mL). Cells were maintained at 37°C in an atmosphere containing 95 % air and saturation humidity of 5 % CO<sub>2</sub>.

### *Statistical analysis*

Data were analyzed using GraphPad Prism version 7.00 (GraphPad software Inc., San Diego, CA, USA) and Excel (Microsoft, Redmond, WA, USA). Each assay was performed a minimum of three times. Data from each assay were expressed as mean ± standard deviation (SD). Differences between the groups were assessed by Duncan's *post-hoc* test after one-way analysis of variance. Statistical significance was accepted at  $p < 0.05$ .

**Figure S1.** The  $^1\text{H}$  NMR spectrum of chrysophanol 8-*O*-glucoside ( $\text{CD}_3\text{OD}$ , 700 MHz)

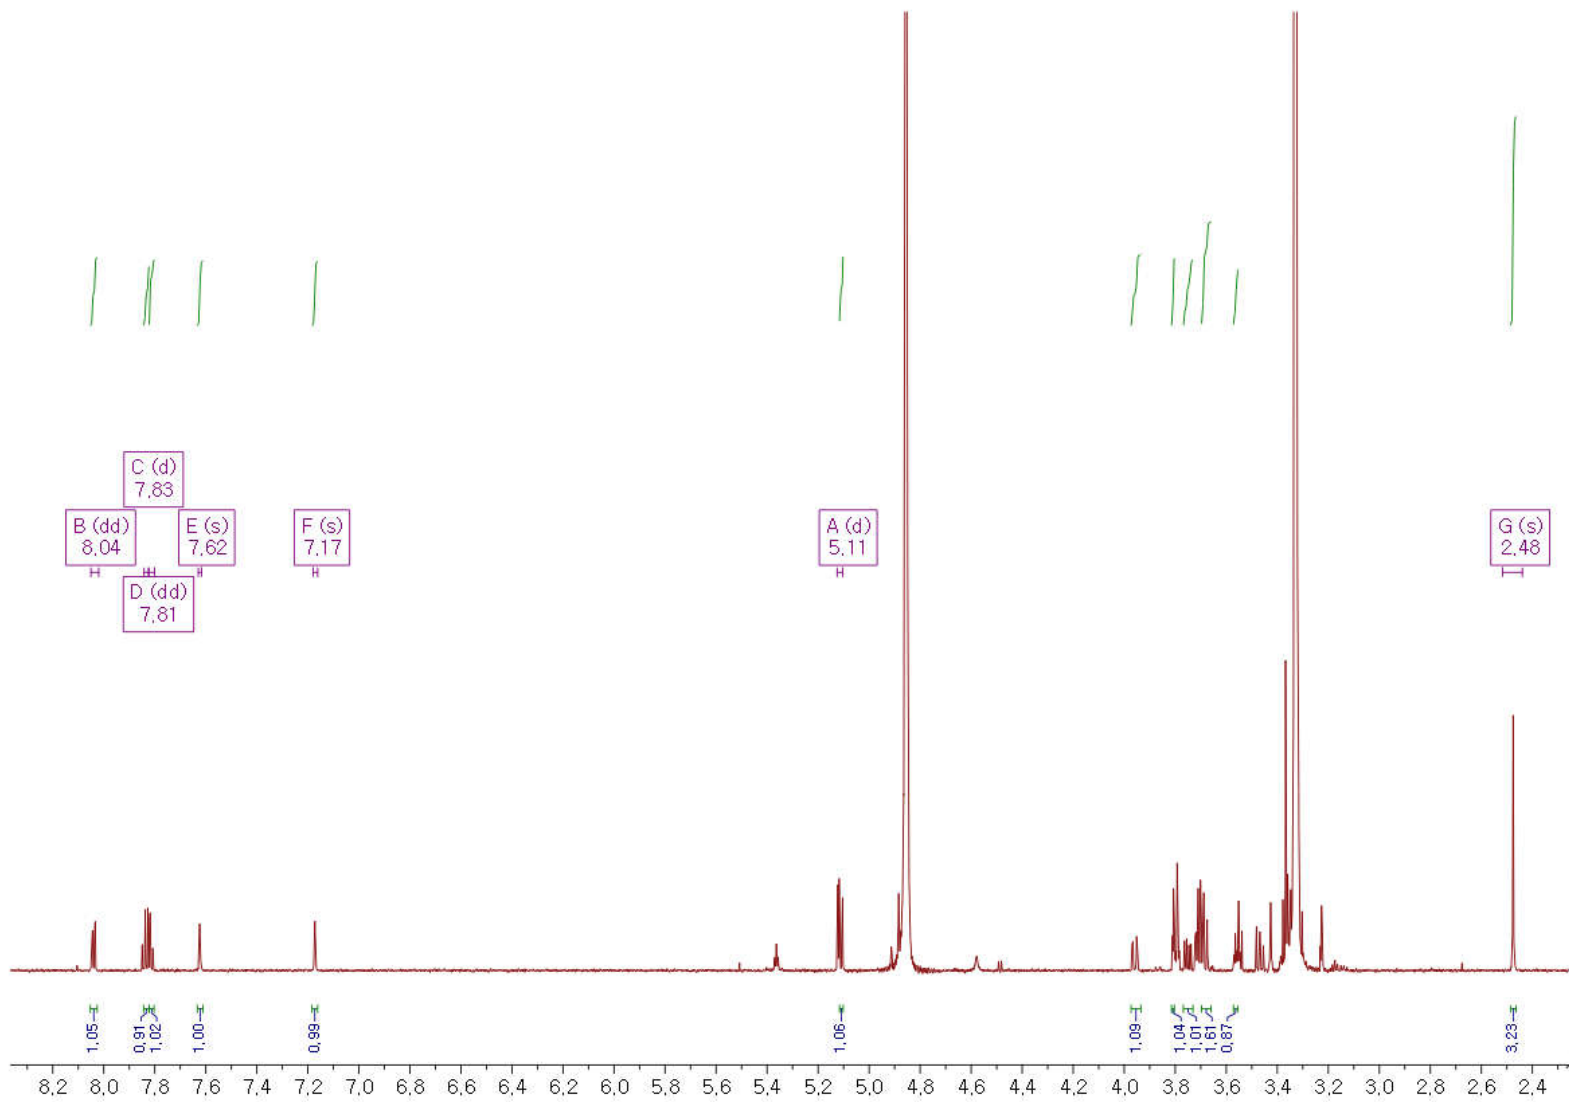

*Chrysophanol 8-O-glucoside*

Yellowish powder. <sup>1</sup>H NMR (CD<sub>3</sub>OD, 700 MHz): δ 8.04 (1H, dd, *J* = 7.5, 1.5 Hz, H-5), 7.83 (1H, dd, *J* = 8.5, 7.5 Hz, H-6), 7.81 (1H, dd, *J* = 8.5, 1.5 Hz, H-7), 7.62 (1H, br s, H-4), 7.17 (1H, br s, H-2), 5.11 (1H, d, *J* = 7.5 Hz, anomeric-H), 3.96–3.56 (sugar-H), 2.48 (3H, s, Ar-CH<sub>3</sub>); ESIMS (negative-ion mode) *m/z* = 415.0 [M – H].

Figure S2. LC/MS data of chrysophanol 8-*O*-glucoside

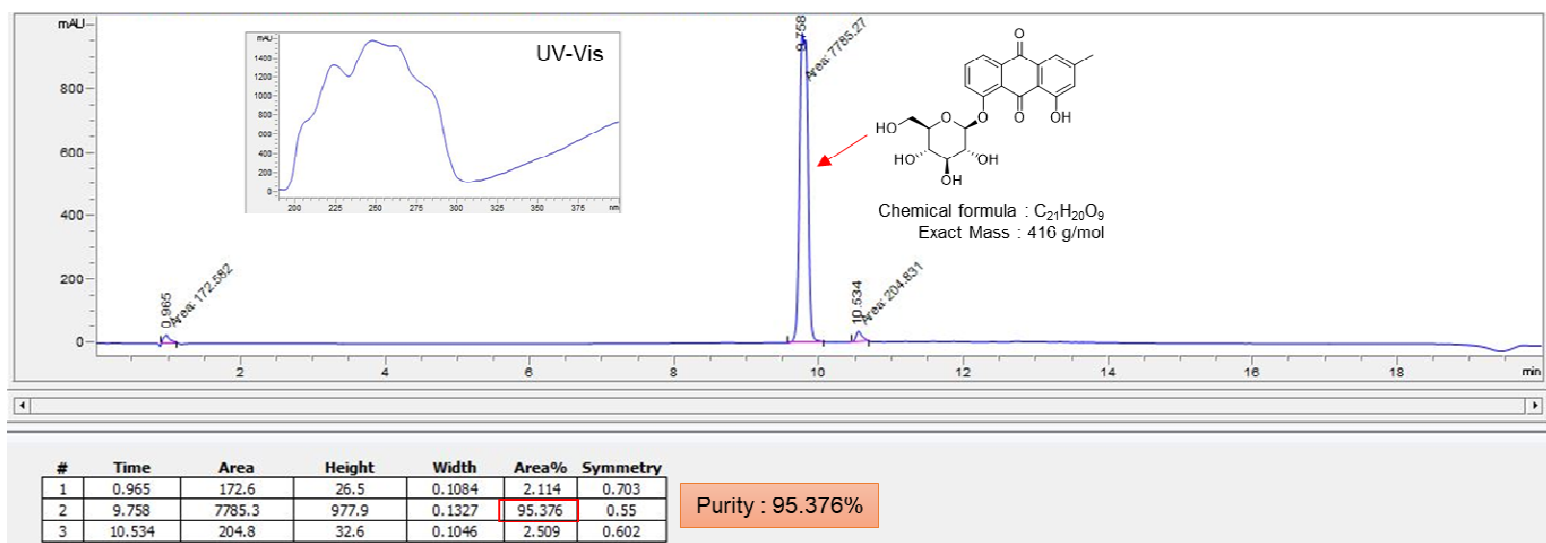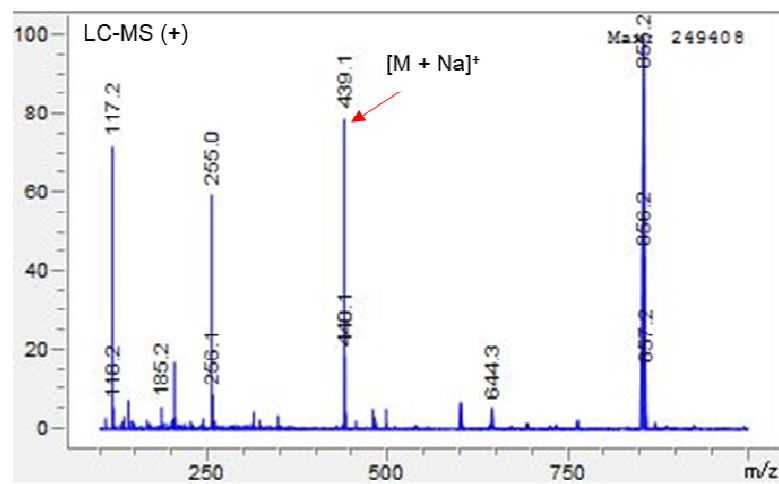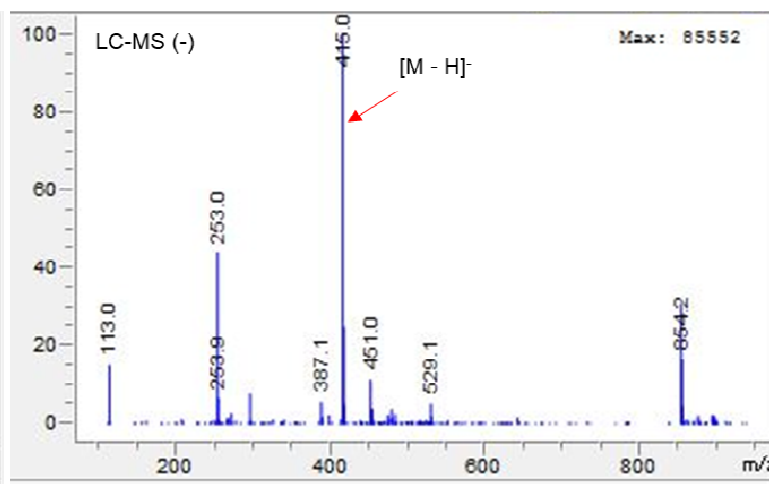

### *LC/MS analysis*

LC/MS analysis for chrysophanol 8-*O*-glucoside was performed by LC/MS (Agilent Technologies, Santa Clara, CA, USA) using a LC-MS Agilent 1200 Series analytical system equipped with a photodiode array (PDA) detector combined with a 6130 Series ESI mass spectrometer. Analysis was performed by injection of 10  $\mu$ L of chrysophanol 8-*O*-glucoside using a Kinetex C18 column (2.1  $\times$  100 mm, 5  $\mu$ m; Phenomenex, Torrance, CA, USA) set at 25°C. The mobile phase consisting of formic acid in H<sub>2</sub>O [0.1% (v/v)] (A) and methanol (B) was delivered at a flow rate of 0.3 mL/min by applying the following programmed gradient elution: 10%-100% (B) for 10 min, 100% (B) isocratic for 5 min, and then 100% to 10% (B) for 5 min, to perform post-run reconditioning of the column.

**Figure S3.** (A) UV chromatogram of LC/MS (detection wavelength was set as 254 nm) of chrysophanol 8-*O*-glucoside. (B) UV chromatogram of LC/MS (detection wavelength was set as 254 nm) of crude EtOH extract.

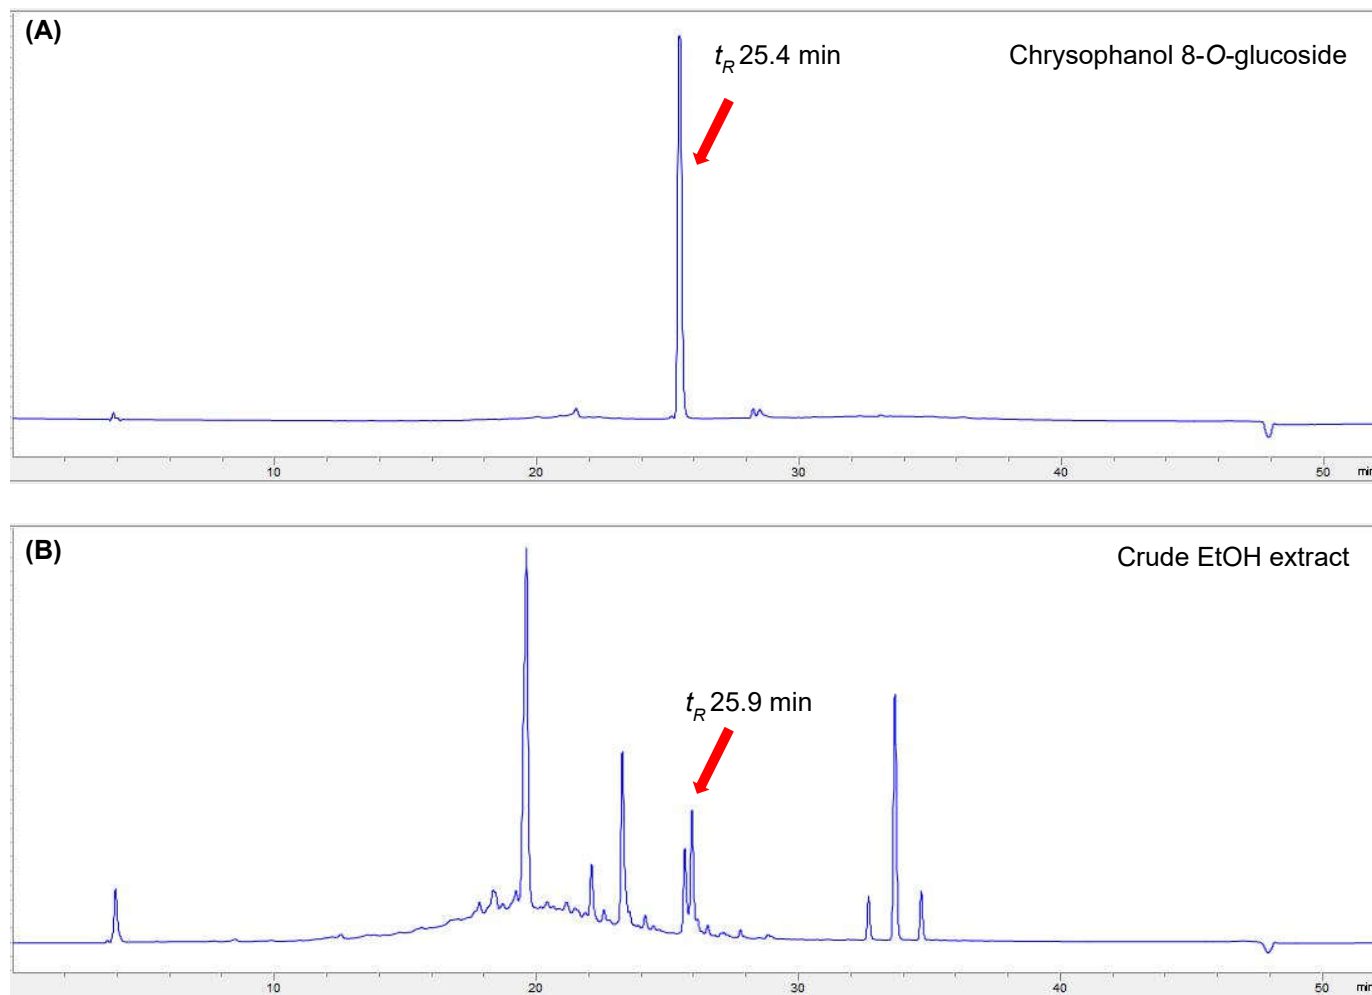



### *LC/MS analysis*

LC/MS analysis for crude EtOH extract and chrysophanol 8-*O*-glucoside was performed by the same LC/MS equipment (Agilent Technologies, Santa Clara, CA, USA). Analysis was performed by injection of 10  $\mu$ L of samples using Agilent Eclipse Plus C18 column (4.6  $\times$  100 mm, 3.5  $\mu$ m; Agilent Technologies) set at 25°C. The mobile phase consisting of formic acid in H<sub>2</sub>O [0.1% (v/v)] (A) and methanol (B) was delivered at a flow rate of 0.3 mL/min by applying the following programmed gradient elution: 0%-100% (B) for 30 min, 100% (B) isocratic for 10 min, 10% (B) for 1 min, and then 10% (B) isocratic for 9 min, to perform post-run reconditioning of the column.
